# Supplementary material for: Mechanistic study of the adsorption capabilities of heavy metals on the surface of ferrihydrite: batch sorption, modeling, and density functional theory
Source: Royal Society of Chemistry journal article supplement (doi:10.1039/d4ra07426b), 2025-01-01
Supplement: d4ra07426b1.pdf [file d4ra07426b1.pdf]

## Supplementary Information

### Mechanistic Study of the Adsorption Capabilities of Heavy Metals on the Surface of Ferrihydrite : Batch sorption, modeling and Density Functional Theory

Bihong He<sup>a</sup>, Wentao Zhang<sup>b\*</sup>, Yanan Diao<sup>c</sup>, Shangchen Sun<sup>a</sup>, Yonghe Zhang<sup>a</sup>,

Wenqing Zhao<sup>a</sup>, Fei Wen<sup>a</sup>, Guangrui Yang<sup>d</sup>

<sup>a</sup> Yellow River Basin Ecotope Integration of Industry and Education Research Institute, Lanzhou Resources & Environment Voc-Tech University, Lanzhou, 730000, China

<sup>b</sup> Northwest Institute of Eco-Environment and Resources, Chinese Academy of Sciences, Lanzhou 730000, China

<sup>c</sup> School of Chemistry, State Key Laboratory of Fine Chemicals, Dalian University of Technology, Dalian, 116024, China

<sup>d</sup> Gansu Zhongshang Food Quality Test and Detection Co., Ltd., Lanzhou, 730010, China

\* Corresponding author. [gslzwtao@sina.com](mailto:gslzwtao@sina.com)

The supporting information provides additional tables and figures showing: Applying the parameters of mono-systems to a multi-system (Fig. S1). The Eads and atomic configuration of Zn<sup>2+</sup> adsorption on different sites of Fh(103) surface (Fig. S2). The Eads and atomic configuration of Ni<sup>2+</sup> adsorption on different sites of Fh(103) surface (Fig. S3). The Bader charge of Pb<sup>2+</sup>, Zn<sup>2+</sup>, Ni<sup>2+</sup> and O in all adsorbed models (Table S1). The bond lengths between the adsorbed ions and the Fh surface (Table S2).

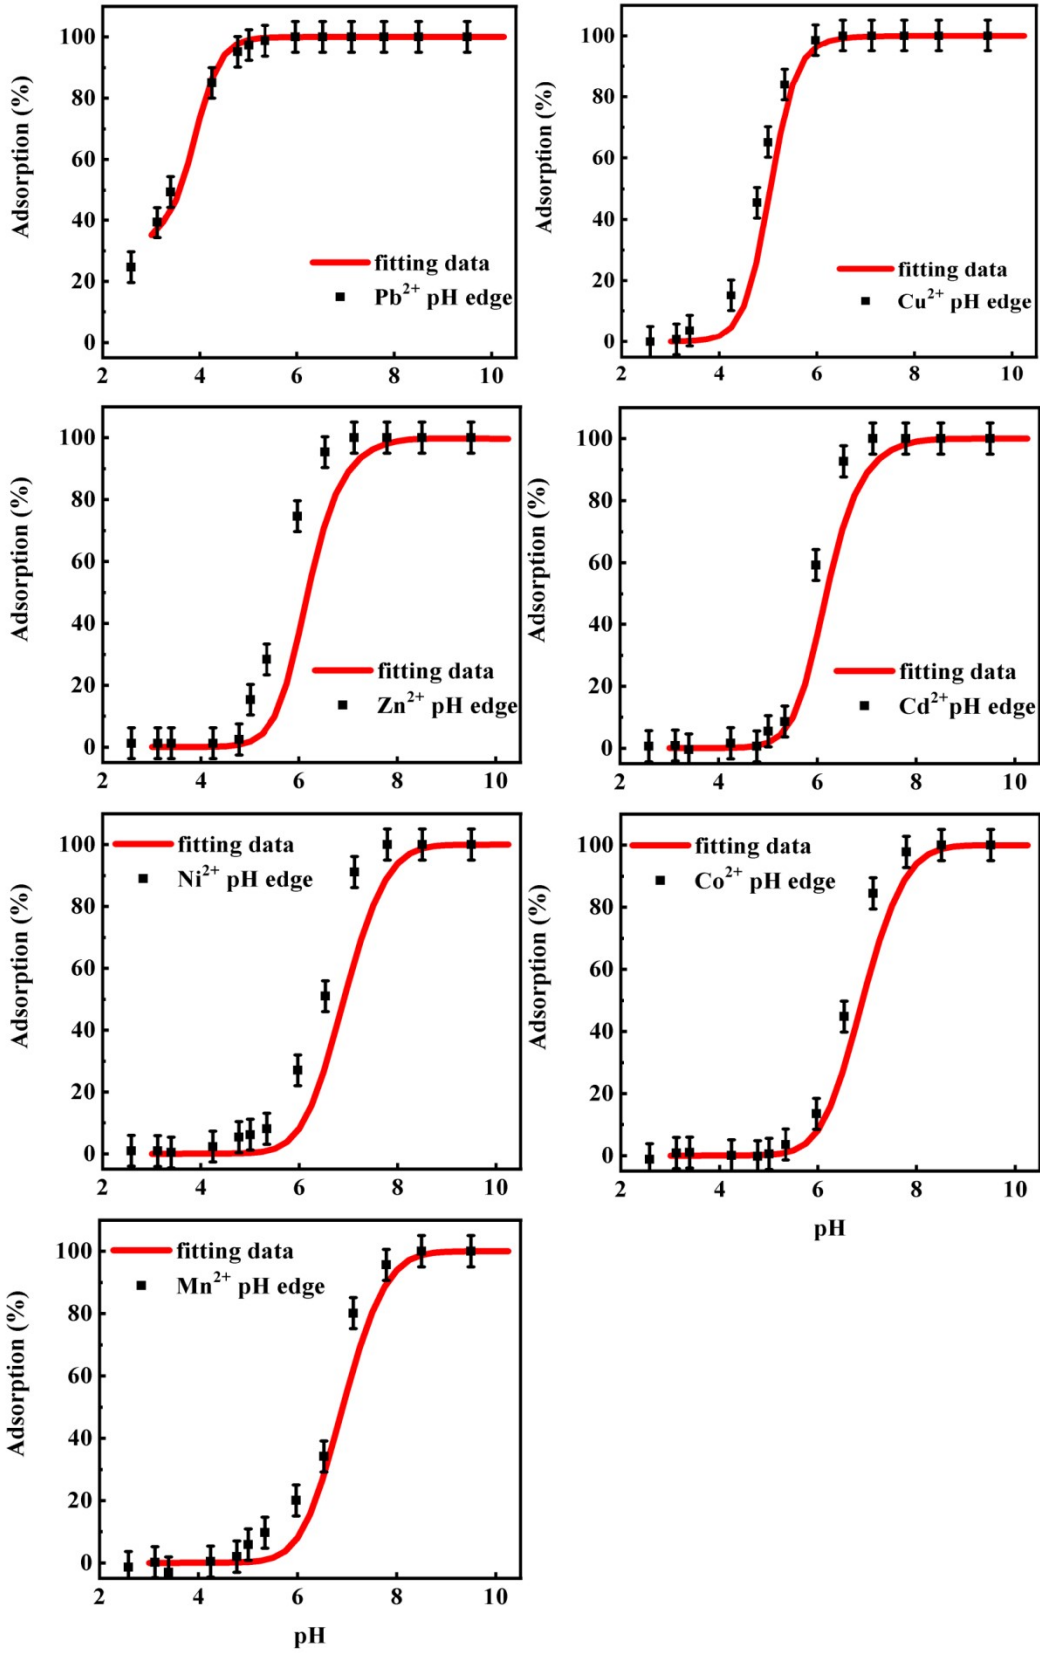

Fig. S1 Applying the parameters of mono-systems to a multi-system

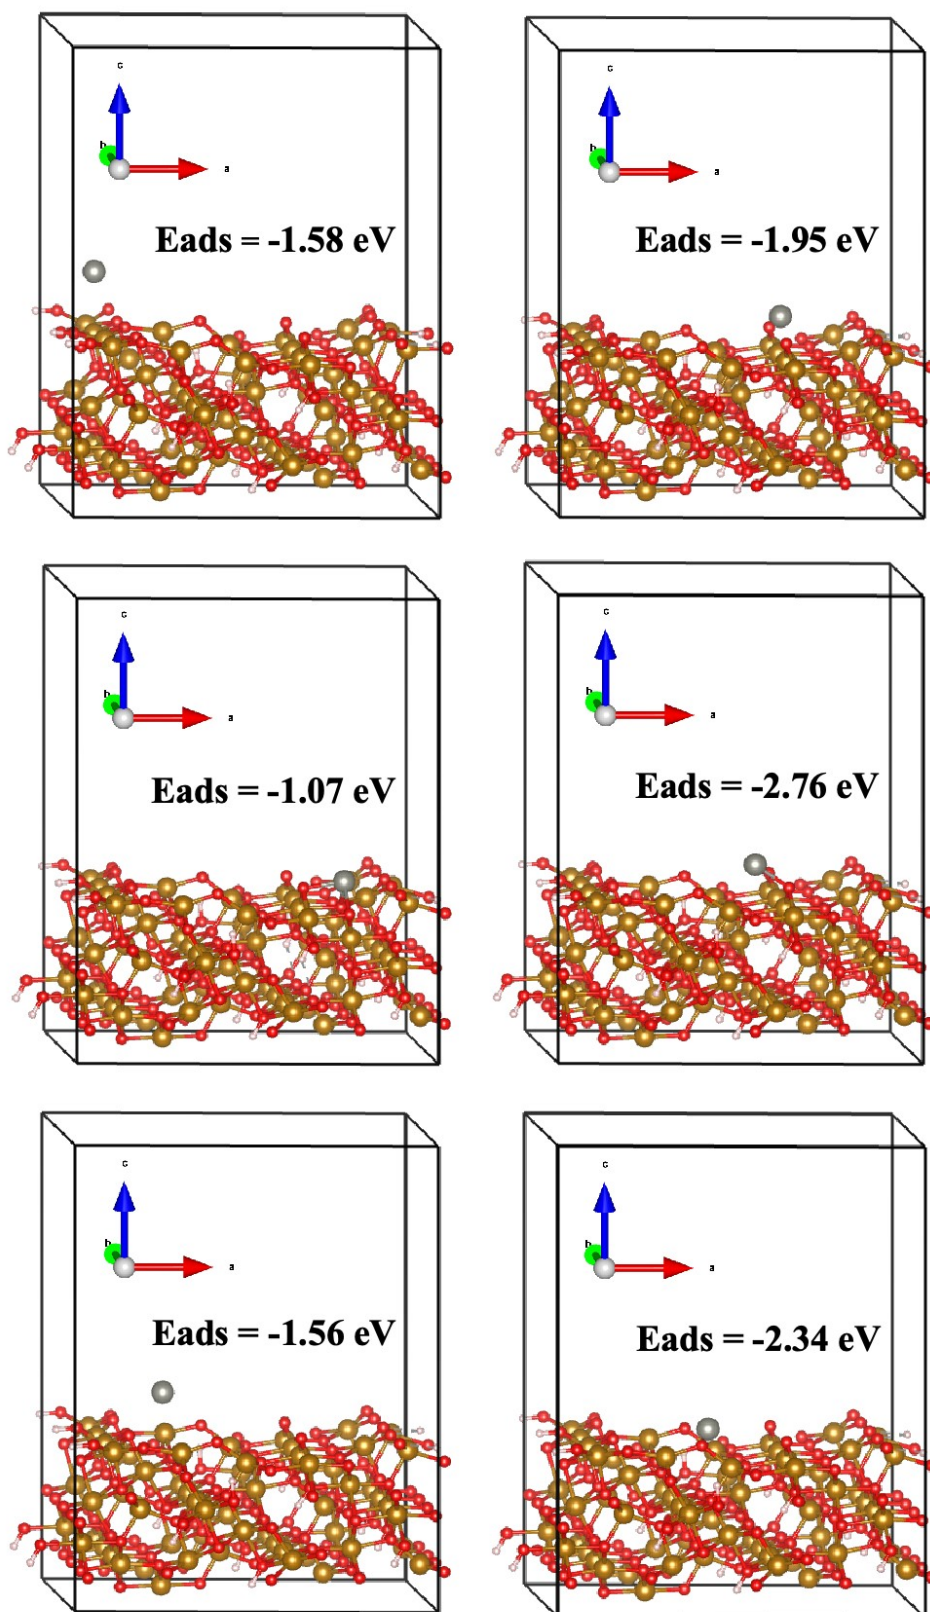

**Fig. S2** The Eads and atomic configuration of  $Zn^{2+}$  adsorption on different sites of Fh(103) surface

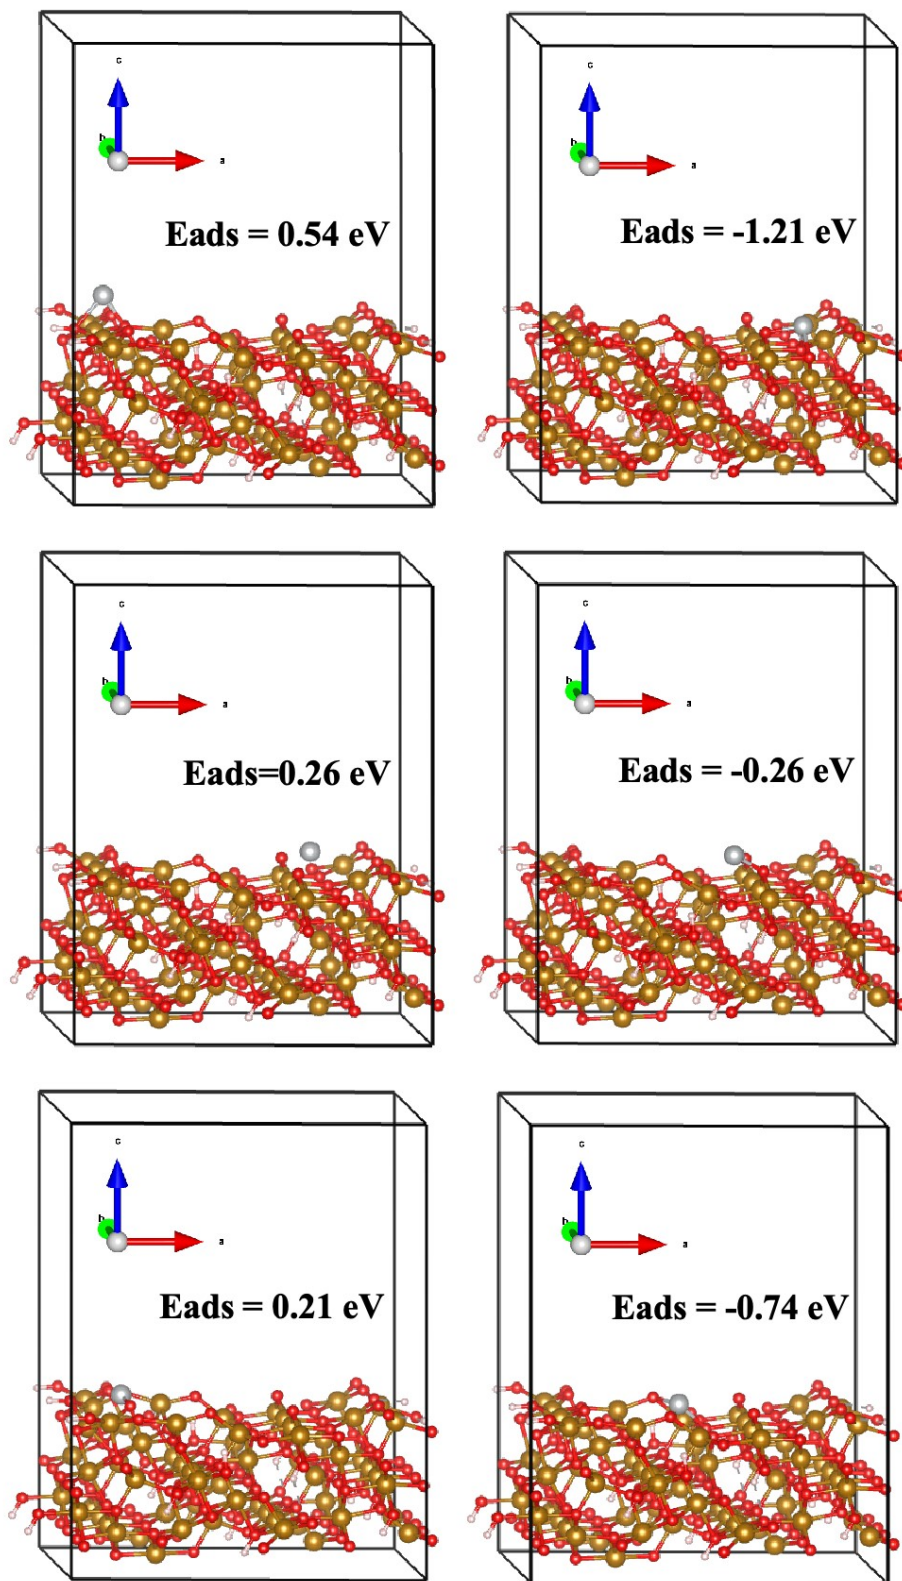

**Fig. S3** The Eads and atomic configuration of Ni<sup>2+</sup> adsorption on different sites of Fh(103) surface

Table S1 The Bader charge of Pb<sup>2+</sup>, Zn<sup>2+</sup>, Ni<sup>2+</sup> and O in all adsorbed models

|            | O     | Pb   | Zn   | Ni   |
|------------|-------|------|------|------|
| Fh(103)-Pb | -0.94 | 0.94 |      |      |
| Fh(103)-Zn | -0.72 |      | 0.72 |      |
| Fh(103)-Ni | -0.63 |      |      | 0.63 |

Table S2 The bond lengths between the adsorbed ions and the Fh surface.

| Adsorbed Ion | Bond Length(Å) |
|--------------|----------------|
| Pb-O         | 2.45 ± 0.08    |
| Zn-O         | 2.73 ± 0.06    |
| Ni-O         | 2.92 ± 0.05    |
